# Supplementary material
Source: MDPI journal article supplement (https://www.mdpi.com/2227-7390/9/17/2165)
Supplement: s1 [file s1 › mathematics-1315211-supplementary.pdf]

# **Supplementary Information: On the modelling of emergency ambulance trips:**

## **The case of the Žilina region**

Ľuboš Buzna<sup>1,2</sup> and Peter Czimmermann<sup>1</sup>

<sup>1</sup>*Department of Mathematical Methods and Operations Research,  
University of Žilina, Univerzitná 8215/1, Žilina, Slovakia*

<sup>2</sup>*Department of International Research Projects - ERA-diate+,  
University of Žilina, Univerzitná 8215/1, Žilina, Slovakia*

### **CONTENTS**

|                                                             |   |
|-------------------------------------------------------------|---|
| S1. Allocation of emergency cases to stations and hospitals | 2 |
| S2. Validation of spatial characteristics                   | 3 |
| S3. Validation of spatial characteristics                   | 4 |
| S4. Validation of temporal characteristics                  | 5 |

# S1. ALLOCATION OF EMERGENCY CASES TO STATIONS AND HOSPITALS

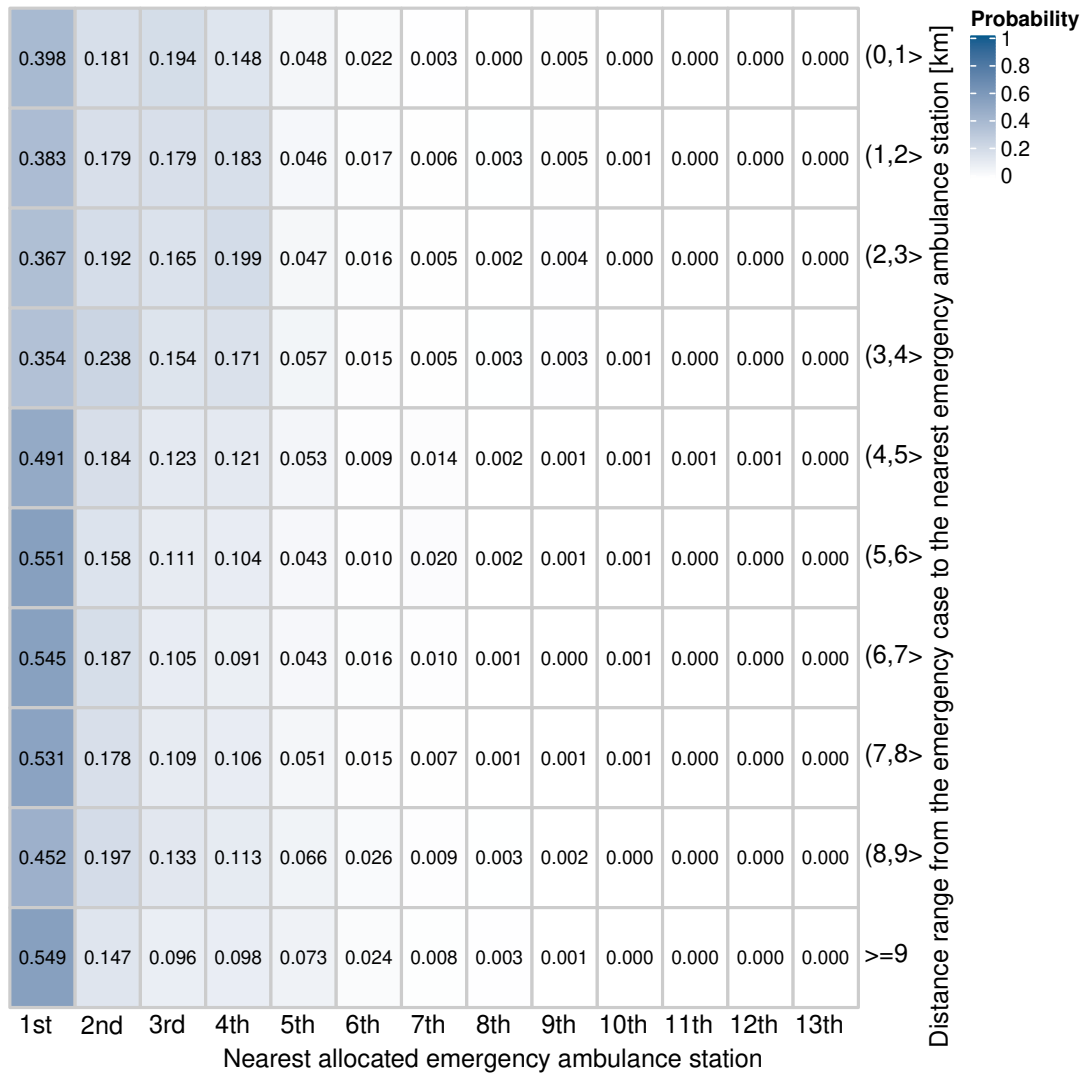

FIG. S1. The empirical probability distributions of emergency cases to be allocated to the  $k$ -th nearest ambulance station (in rows, we present a distribution for each range of the distance from the emergency case location to the nearest emergency ambulance station). In the evaluations, we used the road network distances.

## S2. VALIDATION OF SPATIAL CHARACTERISTICS

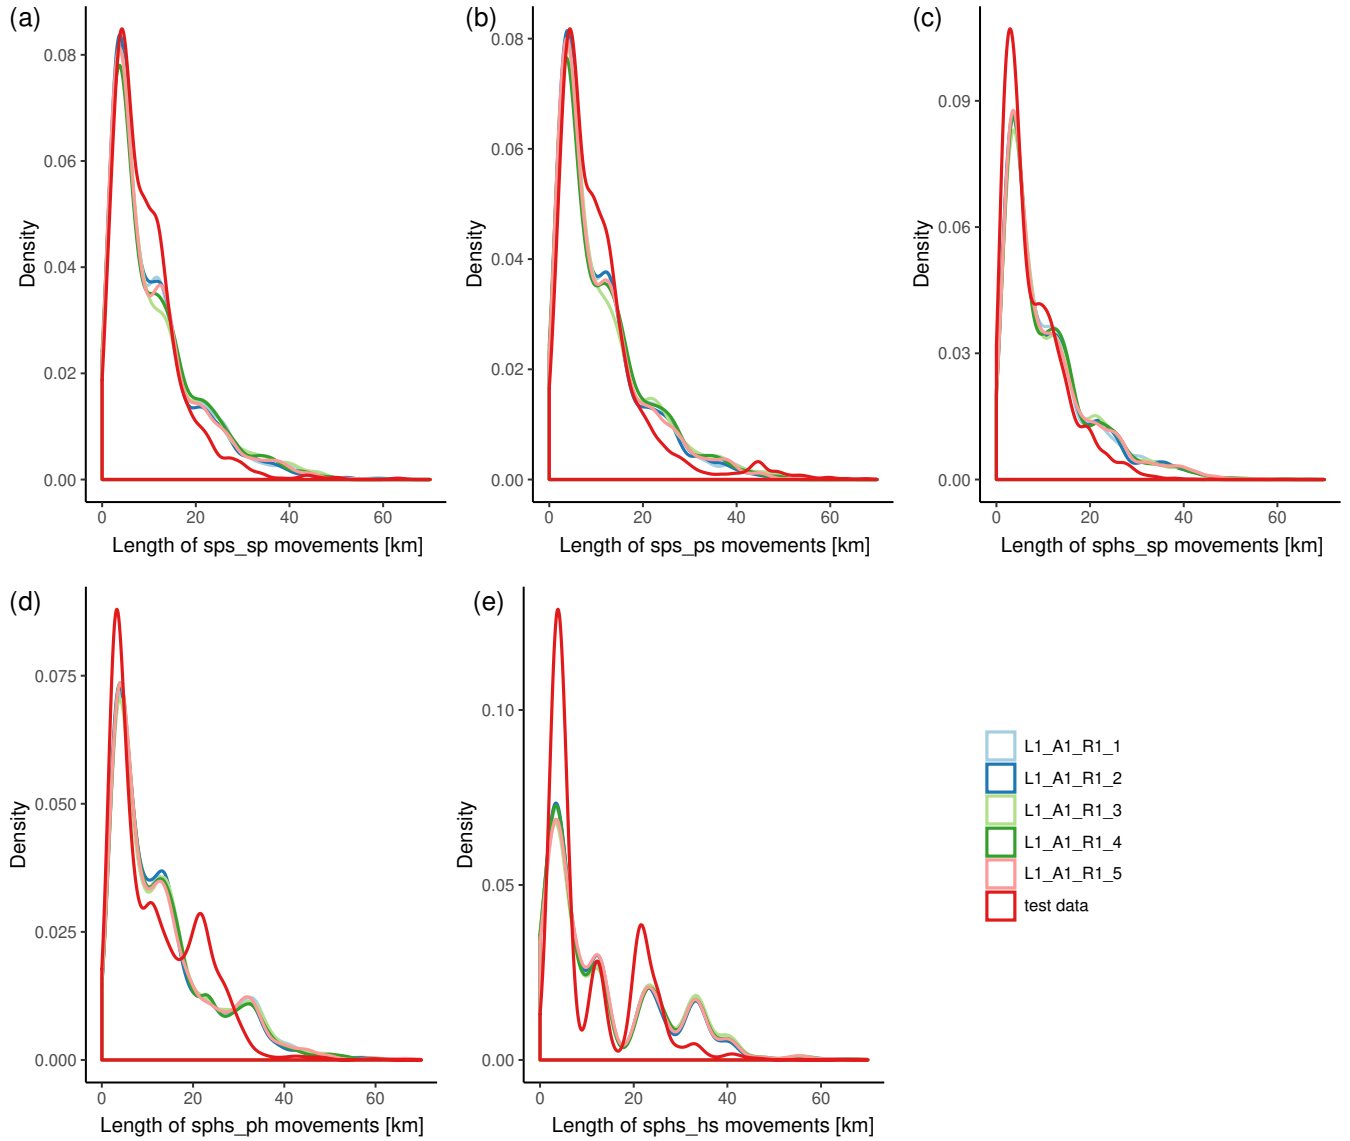

FIG. S2. The probability density functions of movement lengths. Each panel corresponds to a different movement type of “sps and ”sphs“ trips (indicated by the x-axis label). We present five independent sets of trips, all generated using default model settings, i.e. *L1\_A1\_R1*, and contrast them with trips in the test data.

### S3. VALIDATION OF SPATIAL CHARACTERISTICS

TABLE S1. The results of the K-S test obtained by comparing five independent realisations of lengths of movements resulting from the default model  $L1\_A1\_R1\_1$ - $L1\_A1\_R1\_5$  with the length of movements in the test dataset. The value of  $D$  quantifies the difference between empirical distribution functions of compared datasets. P-value is the probability of concluding that compared datasets have different distributions, providing that the null hypothesis is correct. The value  $D_{0.05} = 0.19$  is the threshold value of the K-S statistic at the significance level of  $\alpha = 0.05$ . In all cases  $D < D_{0.05}$ , hence, the hypothesis that samples are drawn from the same distribution is not rejected.

| Model      | Movement | D    | p-value | Test result  |
|------------|----------|------|---------|--------------|
| L1_A1_R1_1 | sps_sp   | 0.09 | 0.81    | not rejected |
| L1_A1_R1_1 | sps_ps   | 0.08 | 0.91    | not rejected |
| L1_A1_R1_1 | sphs_sp  | 0.15 | 0.21    | not rejected |
| L1_A1_R1_1 | sphs_ph  | 0.12 | 0.47    | not rejected |
| L1_A1_R1_1 | sphs_hs  | 0.07 | 0.97    | not rejected |
| L1_A1_R1_2 | sps_sp   | 0.08 | 0.91    | not rejected |
| L1_A1_R1_2 | sps_ps   | 0.09 | 0.81    | not rejected |
| L1_A1_R1_2 | sphs_sp  | 0.13 | 0.37    | not rejected |
| L1_A1_R1_2 | sphs_ph  | 0.11 | 0.58    | not rejected |
| L1_A1_R1_2 | sphs_hs  | 0.08 | 0.91    | not rejected |
| L1_A1_R1_3 | sps_sp   | 0.13 | 0.37    | not rejected |
| L1_A1_R1_3 | sps_ps   | 0.09 | 0.81    | not rejected |
| L1_A1_R1_3 | sphs_sp  | 0.15 | 0.21    | not rejected |
| L1_A1_R1_3 | sphs_ph  | 0.14 | 0.28    | not rejected |
| L1_A1_R1_3 | sphs_hs  | 0.12 | 0.47    | not rejected |
| L1_A1_R1_4 | sps_sp   | 0.10 | 0.70    | not rejected |
| L1_A1_R1_4 | sps_ps   | 0.12 | 0.47    | not rejected |
| L1_A1_R1_4 | sphs_sp  | 0.16 | 0.15    | not rejected |
| L1_A1_R1_4 | sphs_ph  | 0.14 | 0.28    | not rejected |
| L1_A1_R1_4 | sphs_hs  | 0.06 | 0.99    | not rejected |
| L1_A1_R1_5 | sps_sp   | 0.10 | 0.70    | not rejected |
| L1_A1_R1_5 | sps_ps   | 0.11 | 0.58    | not rejected |
| L1_A1_R1_5 | sphs_sp  | 0.15 | 0.21    | not rejected |
| L1_A1_R1_5 | sphs_ph  | 0.13 | 0.37    | not rejected |
| L1_A1_R1_5 | sphs_hs  | 0.09 | 0.81    | not rejected |

TABLE S2. The results of the K-S test obtained by comparing the length of movements generated by models with the length of movements in the test dataset. The value of  $D$  quantifies the difference between empirical distribution functions of compared datasets. P-value is the probability of concluding that compared datasets have different distributions, providing that the null hypothesis is correct. The value  $D_{0.05} = 0.19$  is the threshold value of the K-S statistic at the significance level of  $\alpha = 0.05$ . In all cases  $D < D_{0.05}$ , thus the hypothesis that samples are drawn from the same distribution is not rejected.

| Model    | Movement | D    | p-value | Test result  |
|----------|----------|------|---------|--------------|
| L1_A1.R2 | sps_sp   | 0.09 | 0.81    | not rejected |
| L1_A1.R2 | sps_ps   | 0.12 | 0.47    | not rejected |
| L1_A1.R2 | sphs_sp  | 0.11 | 0.58    | not rejected |
| L1_A1.R2 | sphs_ph  | 0.12 | 0.47    | not rejected |
| L1_A1.R2 | sphs_hs  | 0.07 | 0.97    | not rejected |
| L1_A2.R1 | sps_sp   | 0.09 | 0.81    | not rejected |
| L1_A2.R1 | sps_ps   | 0.08 | 0.91    | not rejected |
| L1_A2.R1 | sphs_sp  | 0.15 | 0.21    | not rejected |
| L1_A2.R1 | sphs_ph  | 0.12 | 0.47    | not rejected |
| L1_A2.R1 | sphs_hs  | 0.13 | 0.37    | not rejected |
| L1_A3.R1 | sps_sp   | 0.09 | 0.81    | not rejected |
| L1_A3.R1 | sps_ps   | 0.08 | 0.91    | not rejected |
| L1_A3.R1 | sphs_sp  | 0.15 | 0.21    | not rejected |
| L1_A3.R1 | sphs_ph  | 0.09 | 0.81    | not rejected |
| L1_A3.R1 | sphs_hs  | 0.09 | 0.81    | not rejected |
| L2_A1.R1 | sps_sp   | 0.11 | 0.58    | not rejected |
| L2_A1.R1 | sps_ps   | 0.09 | 0.81    | not rejected |
| L2_A1.R1 | sphs_sp  | 0.15 | 0.21    | not rejected |
| L2_A1.R1 | sphs_ph  | 0.15 | 0.21    | not rejected |
| L2_A1.R1 | sphs_hs  | 0.07 | 0.97    | not rejected |
| L3_A1.R1 | sps_sp   | 0.09 | 0.81    | not rejected |
| L3_A1.R1 | sps_ps   | 0.11 | 0.58    | not rejected |
| L3_A1.R1 | sphs_sp  | 0.13 | 0.37    | not rejected |
| L3_A1.R1 | sphs_ph  | 0.14 | 0.28    | not rejected |
| L3_A1.R1 | sphs_hs  | 0.09 | 0.81    | not rejected |

#### S4. VALIDATION OF TEMPORAL CHARACTERISTICS

TABLE S3. The results of the K-S test obtained by comparing five independent realisations of duration of movements resulting from the default model  $L1\_A1\_R1\_1$ - $L1\_A1\_R1\_5$  with the length of movements in the test dataset. The value of  $D$  quantifies the difference between empirical distribution functions of compared datasets. P-value is the probability of concluding that compared datasets have different distributions, providing that the null hypothesis is correct. The value  $D_{0.05} = 0.19$  is the threshold value of the K-S statistic at the significance level of  $\alpha = 0.05$ . In cases when  $D < D_{0.05}$ , the hypothesis that samples are drawn from the same distribution is not rejected.

| Model      | Movement | D    | p-value | Test result  |
|------------|----------|------|---------|--------------|
| L1_A1_R1_1 | sps_sp   | 0.13 | 0.66    | not rejected |
| L1_A1_R1_1 | sps_ps   | 0.34 | 0.00    | rejected     |
| L1_A1_R1_1 | sphs_sp  | 0.10 | 0.70    | not rejected |
| L1_A1_R1_1 | sphs_ph  | 0.05 | 0.99    | not rejected |
| L1_A1_R1_1 | sphs_hs  | 0.37 | 0.00    | rejected     |
| L1_A1_R1_2 | sps_sp   | 0.12 | 0.47    | not rejected |
| L1_A1_R1_2 | sps_ps   | 0.34 | 0.00    | rejected     |
| L1_A1_R1_2 | sphs_sp  | 0.09 | 0.81    | not rejected |
| L1_A1_R1_2 | sphs_ph  | 0.07 | 0.97    | not rejected |
| L1_A1_R1_2 | sphs_hs  | 0.36 | 0.00    | rejected     |
| L1_A1_R1_3 | sps_sp   | 0.13 | 0.37    | not rejected |
| L1_A1_R1_3 | sps_ps   | 0.35 | 0.00    | rejected     |
| L1_A1_R1_3 | sphs_sp  | 0.09 | 0.81    | not rejected |
| L1_A1_R1_3 | sphs_ph  | 0.05 | 0.99    | not rejected |
| L1_A1_R1_3 | sphs_hs  | 0.40 | 0.00    | rejected     |
| L1_A1_R1_4 | sps_sp   | 0.14 | 0.28    | not rejected |
| L1_A1_R1_4 | sps_ps   | 0.38 | 0.00    | rejected     |
| L1_A1_R1_4 | sphs_sp  | 0.08 | 0.91    | not rejected |
| L1_A1_R1_4 | sphs_ph  | 0.06 | 0.99    | not rejected |
| L1_A1_R1_4 | sphs_hs  | 0.38 | 0.00    | rejected     |
| L1_A1_R1_5 | sps_sp   | 0.15 | 0.21    | not rejected |
| L1_A1_R1_5 | sps_ps   | 0.38 | 0.00    | rejected     |
| L1_A1_R1_5 | sphs_sp  | 0.09 | 0.90    | not rejected |
| L1_A1_R1_5 | sphs_ph  | 0.05 | 0.99    | not rejected |
| L1_A1_R1_5 | sphs_hs  | 0.37 | 0.00    | rejected     |

TABLE S4. The results of the K-S test obtained by comparing the duration of movements generated by models with the length of movements in the test dataset. The value of  $D$  quantifies the difference between empirical distribution functions of compared datasets. P-value is the probability of concluding that compared datasets have different distributions, providing that the null hypothesis is correct. The value  $D_{0.05} = 0.19$  is the threshold value of the K-S statistic at the significance level of  $\alpha = 0.05$ . In cases when  $D < D_{0.05}$  the hypothesis that samples are drawn from the same distribution is not rejected.

| Model    | Movement | D    | p-value | Test result  |
|----------|----------|------|---------|--------------|
| L1_A1.R2 | sps_sp   | 0.12 | 0.47    | not rejected |
| L1_A1.R2 | sps_ps   | 0.39 | 0.00    | rejected     |
| L1_A1.R2 | sphs_sp  | 0.07 | 0.97    | not rejected |
| L1_A1.R2 | sphs_ph  | 0.05 | 0.99    | not rejected |
| L1_A1.R2 | sphs_hs  | 0.37 | 0.00    | rejected     |
| L1_A2.R1 | sps_sp   | 0.12 | 0.47    | not rejected |
| L1_A2.R1 | sps_ps   | 0.37 | 0.00    | rejected     |
| L1_A2.R1 | sphs_sp  | 0.10 | 0.70    | not rejected |
| L1_A2.R1 | sphs_ph  | 0.30 | 0.00    | rejected     |
| L1_A2.R1 | sphs_hs  | 0.43 | 0.00    | rejected     |
| L1_A3.R1 | sps_sp   | 0.12 | 0.47    | not rejected |
| L1_A3.R1 | sps_ps   | 0.37 | 0.00    | rejected     |
| L1_A3.R1 | sphs_sp  | 0.10 | 0.70    | not rejected |
| L1_A3.R1 | sphs_ph  | 0.10 | 0.70    | not rejected |
| L1_A3.R1 | sphs_hs  | 0.36 | 0.00    | rejected     |
| L2_A1.R1 | sps_sp   | 0.10 | 0.70    | not rejected |
| L2_A1.R1 | sps_ps   | 0.38 | 0.00    | rejected     |
| L2_A1.R1 | sphs_sp  | 0.10 | 0.70    | not rejected |
| L2_A1.R1 | sphs_ph  | 0.07 | 0.97    | not rejected |
| L2_A1.R1 | sphs_hs  | 0.37 | 0.00    | rejected     |
| L3_A1.R1 | sps_sp   | 0.15 | 0.21    | not rejected |
| L3_A1.R1 | sps_ps   | 0.36 | 0.00    | rejected     |
| L3_A1.R1 | sphs_sp  | 0.07 | 0.97    | not rejected |
| L3_A1.R1 | sphs_ph  | 0.14 | 0.28    | not rejected |
| L3_A1.R1 | sphs_hs  | 0.35 | 0.00    | rejected     |

TABLE S5. The results of the K-S test obtained by comparing the duration of trips in the test dataset with five random realisations of the duration of trips generated by the default model  $L1\_A1\_R1\_1$ - $L1\_A1\_R1\_5$  (top) and with duration of trips generated by evaluated model versions (bottom). The value of  $D$  quantifies the difference between empirical distribution functions of compared datasets. P-value is the probability of concluding that compared datasets have different distributions, providing that the null hypothesis is correct. The value  $D_{0.05} = 0.14$  is the threshold value of the K-S statistic at the significance level of  $\alpha = 0.05$ . In all cases  $D < D_{0.05}$  and the hypothesis that samples are drawn from the same distribution is not rejected.

| Model      | Movement | D    | p-value | Test result  |
|------------|----------|------|---------|--------------|
| L1_A1_R1_1 | sps      | 0.06 | 0.93    | not rejected |
| L1_A1_R1_1 | sphs     | 0.12 | 0.14    | no rejected  |
| L1_A1_R1_2 | sps      | 0.07 | 0.80    | not rejected |
| L1_A1_R1_2 | sphs     | 0.08 | 0.63    | not rejected |
| L1_A1_R1_3 | sps      | 0.05 | 0.96    | not rejected |
| L1_A1_R1_3 | sphs     | 0.10 | 0.27    | not rejected |
| L1_A1_R1_4 | sps      | 0.06 | 0.47    | not rejected |
| L1_A1_R1_4 | sphs     | 0.10 | 0.00    | not rejected |
| L1_A1_R1_5 | sps      | 0.09 | 0.47    | not rejected |
| L1_A1_R1_5 | sphs     | 0.12 | 0.11    | not rejected |
| L1_A1_R2   | sps      | 0.06 | 0.86    | not rejected |
| L1_A1_R2   | sphs     | 0.06 | 0.92    | not rejected |
| L1_A2_R1   | sps      | 0.05 | 0.96    | not rejected |
| L1_A2_R1   | sphs     | 0.08 | 0.54    | not rejected |
| L1_A3_R1   | sps      | 0.06 | 0.86    | not rejected |
| L1_A3_R1   | sphs     | 0.08 | 0.54    | not rejected |
| L2_A1_R1   | sps      | 0.05 | 0.99    | not rejected |
| L2_A1_R1   | sphs     | 0.11 | 0.22    | not rejected |
| L3_A1_R1   | sps      | 0.07 | 0.71    | not rejected |
| L3_A1_R1   | sphs     | 0.09 | 0.47    | not rejected |
